# Supplementary figures and images for: Improving the Inhibitory Effect of Phages against Pseudomonas aeruginosa Isolated from a Burn Patient Using a Combination of Phages and Antibiotics
Source: MDPI journal article supplement (doi:10.3390/v13020334), 2021-02-21

**A**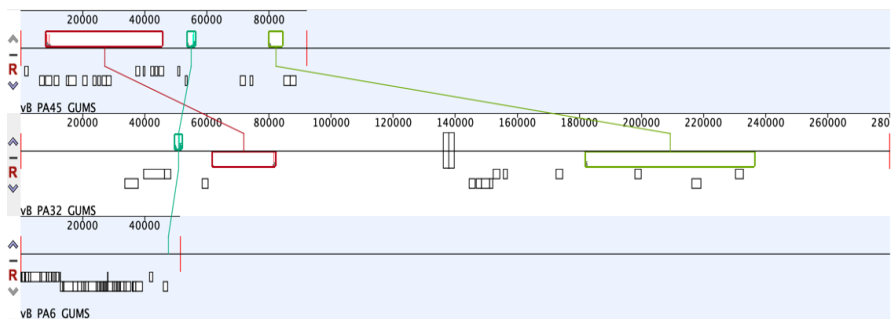**B**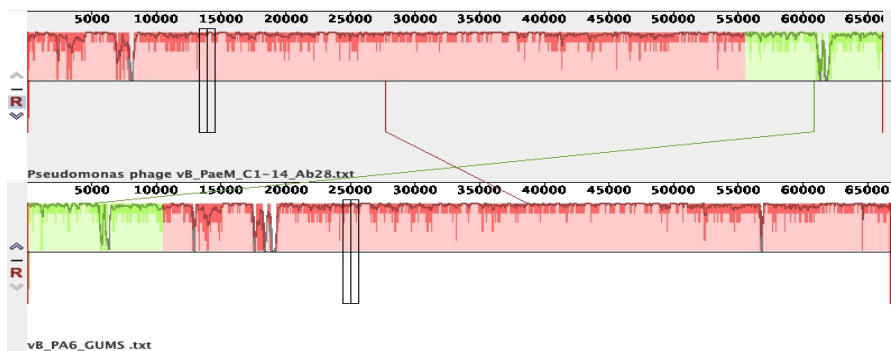**C**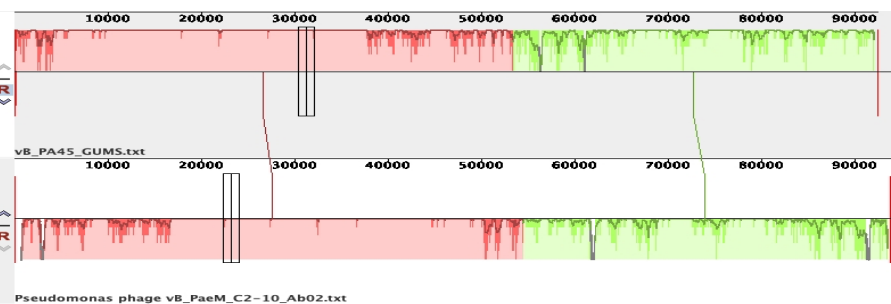**D**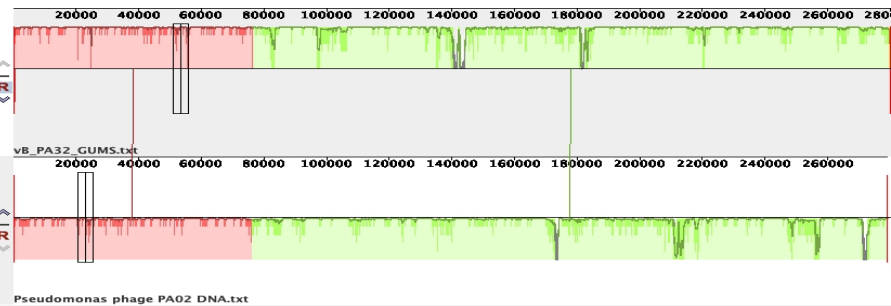

Supplement: s1 [file s1]
